# Supplementary material for: Origami-paper-based device for microvesicle/exosome preconcentration and isolation
Source: Royal Society of Chemistry journal article supplement (doi:10.1039/c9lc00796b), 2019-01-01
Supplement: c9lc00796b1.pdf [file c9lc00796b1.pdf]

## Supplementary Information

# Origami-paper-based device for microvesicle/exosome preconcentration and isolation

Hyerin Kim,<sup>a‡</sup> Kyu Hyoun Lee,<sup>b‡</sup> Sung Il Han,<sup>a</sup> Dongho Lee,<sup>c</sup> Seok Chung,<sup>\*d</sup> Dohwan Lee<sup>\*e</sup> and

Jeong Hoon Lee<sup>\*a</sup>

<sup>a</sup>Department of Electrical Engineering, Kwangwoon University, Seoul 01897, Republic of Korea

<sup>b</sup>Department of Materials Science and Engineering, Yonsei University, Seoul, 03722, South Korea

<sup>c</sup>CALTH. Inc. Changeop-ro 54, Seongnam, Gyeonggi 13449, Republic of Korea

<sup>d</sup>School of Mechanical Engineering, College of Engineering, Korea University, Seoul, 02841, Republic of Korea

<sup>e</sup>School of Electrical and Computer Engineering, Georgia Institute of Technology, Atlanta, USA

<sup>‡</sup>H.K. and K.H.L. contributed equally.

\*Corresponding author: a) [jhlee@kw.ac.kr](mailto:jhlee@kw.ac.kr), d) [sidchung@korea.ac.kr](mailto:sidchung@korea.ac.kr), e) [dlee768@gatech.edu](mailto:dlee768@gatech.edu)

### **Quantification of the enriched microvesicles/exosomes using NTA.**

The concentration of microvesicles/exosomes as in Fig. 3b was quantified with nanoparticle tracking analysis (NTA). To do this, first, layer 6, 8 and 10 were biopsy-punched according to the each size of sample areas. Each punched-layer was immersed in buffer solution (0.1X PBS with 0.01% Tween 20) and then we applied 10 min vortexing and centrifugation for resuspension of the pre-concentrated microvesicles/exosomes. After taking out the punched-layer from the resuspended solution, the concentration of microvesicles/exosomes were measured by NTA machine.

\*Information for the NTA machine:

Nanoparticle tracking analysis (NTA, NanoSight LM10, NanoSight Technology, UK)

NTA version : 3.3 Dev Build 3.3.104 software (Malvern)

Camera type : CCD camera

Camera level: 12

FPS : 30 FPS

Temperature: 24°C

Viscosity: (water) 0.9 cP

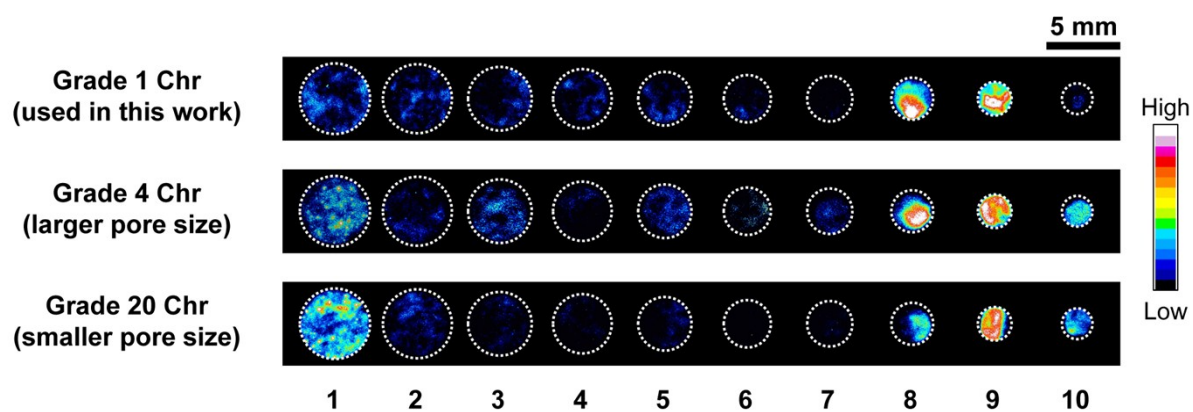

**Fig. S1. Preconcentration of microvesicle/exosome with different pore size papers.** Regardless of pore sizes, microvesicles/exosomes were preconcentrated on layer 8 and 9 in 20 min, but more microvesicles/exosomes were stuck to the first layer of the smaller paper matrix.
